1 **Experiences of the physicians in the largest COVID-19 dedicated**

2 **hospital of Bangladesh about COVID-19 and its aftermath**

3 Reaz Mahmud<sup>1\*</sup>, Sultana Shahana Banu<sup>2</sup>, Nusrat Sultana<sup>2</sup>, Farhana Binte Monayem<sup>3</sup>, Ponkaj  
4 Kanti Datta<sup>4</sup>, Mohammad Mahfuzul Hoque<sup>4</sup>, S.M. Habibur Rahman Habib<sup>5</sup>, Joynal Abedin<sup>5</sup>,  
5 Md. Fakhrul Islam<sup>1</sup>, Md, Arifuzzaman<sup>1</sup>, Md Khairul Islam<sup>4</sup>, Sudip Ranjan Deb<sup>4</sup>, Ahmed  
6 Hossain Chowdhury<sup>1</sup>, Kazi Gias Uddin Ahmed<sup>1</sup>, Md. Titu Miah<sup>4</sup>, Md. Mujibur Rahman<sup>6</sup>

7  
8 <sup>1</sup>Department of Neurology, Dhaka Medical College, Dhaka, Bangladesh

9 <sup>2</sup>Department of Virology, Dhaka Medical College, Dhaka, Bangladesh

10 <sup>3</sup>Department of Medicine, Sarkari Karmachari Hospital, Dhaka, Bangladesh.

11 <sup>4</sup>Department of Medicine, Dhaka Medical College, Dhaka, Bangladesh

12 <sup>5</sup>Department of Medicine, DNCC Dedicated Covid-19 Hospital, Dhaka Bangladesh

13 <sup>6</sup>Department of Medicine, Bangabandhu Sheikh Mujib Medical University, Dhaka. Bangladesh

14

15 \* Corresponding author Mail- [reazdmc22@yahoo.com](mailto:reazdmc22@yahoo.com) (RM)

16

17

18

19

20

21

22

## 23 **Experiences of the physicians in the largest COVID-19 dedicated** 24 **hospital of Bangladesh about COVID-19 and its aftermath**

### 25 **Abstract:**

26 **Background:** The doctors and the other health care workers are the first-line fighters against  
27 COVID-19. This study aims to identify the prevalence, risk factors, clinical severity of COVID-  
28 19 infection among the doctors working in the COVID unit. We also analyzed the hospital data  
29 for admission and RT-PCR positivity among the physicians.

### 30 **Methods:**

31 It was a cross-sectional survey and review of the hospital database. We surveyed from  
32 September 2021 to October 2021 and explored the hospital data from march 2020 to September  
33 2021. We included 342 physicians for analysis in the survey. We reviewed hospital data of 1578  
34 total admitted patients and 336 RT-PCR test positive physicians for analyzing the hospital  
35 admission rate, the positivity rate for COVID-19 among the physicians and the other patients in  
36 the different COVID- 19 surges.

### 37 **Findings:**

38 In this study, we demonstrated the physicians' sufferings during the pandemic era. We have  
39 observed four surges in the hospital admission and RT-PCR for COVID-19 positivity rate among  
40 the physicians and the general population. The physicians experienced a similar surge in the  
41 hospital admission and positivity rate to the general population. The hospital admission was  
42 lower in the fourth surge among the physicians than the general population. The positivity rate  
43 was higher in the first, second and third surge among the physicians. In the survey, a total of  
44 146(42%) respondents had COVID-19 infection, and among them, 50(34.2%) had re-detectable

45 positive SARS-CoV-2 infection. Most of them experienced mild (77[52.7%]) to moderate  
46 (41[28.1%]) symptoms. Increasing age (OR, 95%CI, p-value; 1.15, 1.05-1.25, 0.002), male sex  
47 (OR, 95%CI, p-value; 5.8, 3.2-9.8, <0.001), and diabetes (OR, 95%CI, p-value; 25.6, 2-327.2,  
48 0.01) were the risk factor of having COVID-19. Female sex and diabetes were the risk factors for  
49 re-detectable positive SARS-CoV-2 infection. (OR, 95%CI, p-value; 0.24, 0.09-0.67, 0.006; 44,  
50 8.9-218.7, <0.001 respectively). Most respondents suffered for 7-14 days. Total 98(67%)  
51 suffered from post-COVID fatigue.

## 52 **Conclusions:**

53 The physicians observed four surges in hospital admission and COVID-19 positivity rate. A  
54 significant number of the COVID-warrior became positive for SARS-CoV-2, had re-detectable  
55 positive SARS-CoV-2 infection, and suffered in the post-COVID-19 state.

56 **Keywords:** COVID-19, post-COVID-19 state, physician, COVID-waves, re-detectable positive  
57 (RP) SARS-CoV-2 infection, post-COVID fatigue.

## 58 **INTRODUCTION**

59 The coronavirus disease 19 (COVID-19) is a novel disease caused by SARS CoV-2[1] and was  
60 first identified in the Wuhan city of China [2]. The virus had a very high spreading potential,  
61 with the initial estimated R0 for the 2019-nCoV ranging from 2.24 to 3.58 [3]. It created  
62 an unprecedented global health crisis, and within a month, the World Health organization had to  
63 declare it a pandemic [4,5]. The health system of most countries was overburdened and  
64 exhausted with the increasing number of cases, exposing the gaps of the modern health care  
65 systems [6].

66 By May 2020, health care workers (HCWs) were 4% among all infected cases, and for every 100  
67 HCWs, that got infected one, died. [7]. The death of Li Wenliang, the Chinese whistleblower

68 doctor, touched the heart of all people [8]. About 7000 HCWs died of COVID-19 by September  
69 2020, according to a report of Amnesty International [9].

70 In Bangladesh first cases were identified on 8 March 2020[10] and a public hospital in Dhaka  
71 was designated to treat COVID-19 [11]. Now, in Bangladesh total of 600 hospitals are dedicated  
72 to treating the COVID patients, where 9708 doctors, 17155 nurses, and 17933 other health care  
73 staff are working day-night to serve the COVID-19 patients [12]. Dhaka Medical College, the  
74 largest tertiary hospital, started its journey as a COVID dedicated in May 2020 [13]. Here, 180  
75 doctors, 330 nurses, and 160 other healthcare staff are on duty to serve the patients in 600  
76 COVID dedicated beds [12].

77 In Bangladesh, there are 3.05 physicians per 10,000 population and 1.07 nurses per 10,000  
78 populations, according to a report of WHO reports [14]. The COVID-19 increased the workload  
79 further. Initially, 8-10 doctors and 2-3 nurses were allocated in an 8-hour shift to attend 200-300  
80 and 40-50 patients, respectively [15]. By December 2020, a total of 2885 physicians, 1979  
81 nurses, and 3285 health care workers were positive for COVID-19, and 121 physicians died of  
82 COVID-19[16]. In one of our previous studies, we found a large proportion of COVID-19  
83 patients also suffered in the post-COVID state [17]. To pay tribute to our unseen heroes, we  
84 should acknowledge their sufferings holistically in the COVID-19 disease and post COVID19  
85 states. This study aims to identify the prevalence of COVID-19 infection among the doctors  
86 working in the COVID unit, its risk factors, the clinical severity, and suffering in the post-  
87 COVID state. We also analyzed the hospital data for admission and RT-PCR positivity among  
88 the physicians who used the institute health facilities.

## 89 **Materials and methods**

90 This cross-sectional survey was conducted Dhaka Medical College. We surveyed from  
91 September 2021 to October 2021. We explored the hospital data from march 2020 to September  
92 2021 for the hospital admission rate, the positivity rate for COVID-19 among the physicians, and  
93 we compared these with the general populations. We obtained informed written consent from the  
94 survey participants and ethical clearance from the ethical review committee of the Dhaka  
95 Medical College. (ERC.DMC-ECC/2021/399)

## 96 **Participants**

97 We recruited physicians of all ranks and both gender who had worked or are working in the  
98 Dhaka Medical College Hospital, COVID-19 unit. Those who gave incomplete answers or were  
99 unwilling to participate were excluded from the survey. The calculated sample size was 384.

## 100 **Study procedure**

101 The questionnaire for survey had four sub-segments. The first segment comprised the  
102 demographic data, presence or absence of different comorbidity, and vaccine status of the  
103 participants. The second segment contains information regarding the infection with COVID-19,  
104 its severity, the interval between the completion of the duty and the COVID positivity, the time  
105 required to become COVID negative, the requirement of hospitalization or oxygen therapy or  
106 ICU support, and the IPC measures. The information regarding the post COVID status was in the  
107 third segment of the questionnaire. The fourth part contained opinions regarding the cause of  
108 infection. It had a rating of 1-10. Where 1-3 meant not agreed, 4-6 meant agreed, 7-10 strongly  
109 agreed.

110 COVID-19 dedicated hospital or unit meant hospital or a unit of hospitals designated by the  
111 government for the sole treatment of COVID-19 affected patients. The physicians who had  
112 worked or still working in the COVID-19 unit meant - 1. The physicians who had MBBS (and or

113 above) qualifications 2. Who had Bangladesh Medical & Dental Council (BMDC) registration  
114 number 3. Those had included at least once in the duty roster from May 2020 to September  
115 2021. We defined the mask as any medical mask used for personal protection of doctors against  
116 SARS-CoV-2, which includes: 1. N95 (3M) models like 8210, 1860 2. 3M Full face/half-face  
117 respirators 3. Layered surgical mask, 4. Homemade masks. We defined the PPE as a mask along  
118 with a coverall and face shield or goggles [18]. We described the position of the physicians, their  
119 role in clinical practice, and their duty pattern as Directorate General of Health, Bangladesh, job  
120 description [19]. We defined COVID 19 disease severity and presentation as WHO and  
121 Bangladesh guidelines on COVID-19[20, 21]. The definition of post-COVID status was  
122 according to CDC [22]. We defined Re-detectable positive (RP) SARS-CoV-2 infection as  
123 “recurrence of the symptoms and RT-PCR test positivity after the full clinical recovery and RT-  
124 PCR negativity from an episode of COVID-19 disease” [23]. The surge of the hospital admission  
125 or positivity rate in this study meant a rising or declining trend of the hospital admission or  
126 positivity rate.

## 127 **Statistical analysis**

128 We analyzed the data using IBM SPSS Statistics for Windows, version 20.0. We have expressed  
129 qualitative data as numbers and percentages, quantitative data with normal distribution as means  
130 (SD), and non-normal data as medians (interquartile range [IQR]). We analyzed hospital  
131 admission trends and positivity rates in the Excel datasheet. For observing the differences  
132 between those who were COVID-19 positive and those who were negative, we did a chi-square  
133 test for the qualitative data and an unpaired t-test for the quantitative data. We determined the  
134 risk factors for COVID-19, The Re-detectable positive (RP) SARS-CoV-2 infection, and the

135 post-COVID-19 state with binary logistic regression. We reported the odds ratio with 95% CI  
136 and set the Statistical significance at  $p < 0.05$ .

## 137 **Results:**

138 We accessed 521 doctors with the questionnaire. Among them, 380 doctors responded (response  
139 rate 73%). We included 342 respondents for analysis after scrutiny (Figure 1). Hospital data  
140 showed that 24501 patients were admitted to the COVID unit from May 2020 to September  
141 2021. Among them, 6942 patients have confirmed COVID, and the rest were suspected. During  
142 this time, 1578 physicians and 4408 nurses have admitted to Dhaka Medical College. In the  
143 Dhaka Medical College virology laboratory, the physicians underwent 1159 RT-PCR tests, and  
144 336 tests results were positive.

### 145 **Figure 1: Patient selection for this cross-sectional survey**

#### 146 **Admission surges among the physicians and the other population:**

147 We have observed four surges of admission during the period extending from May 2020 to  
148 September 2021. The first, second, third, and fourth surge extended from May 2020 to mid-  
149 October 2020, mid-November 2020 to mid-January 2021, mid-February 2021 to mid-April 2021,  
150 and mid-June 2021 to mid-October 2021, respectively. The physicians also had the same  
151 admission surges up to the third. In the fourth surge, the physicians had a small peak. The first  
152 admission surge of the physicians started late in the initial part of June 2020 (Figure 2).

### 153 **Figure 2: Hospital admission surges among the general population, nurses, and physicians**

154

#### 155 **Demography and the comorbidities with their associated risk of COVID-19 infection** 156 **among the survey physicians:**

157 The study populations were young with mean age (SD) of 33.8(6) years and were mostly male  
 158 181(52.9). Male and elderly (>40 years) physicians had a significantly high prevalence of  
 159 COVID-19 infection (n (%), p-value, 95%CI 107[59.1], <0.001, 4.5[2.8-7.2] and 33[61.1%],  
 160 0.004, 2.4[1.3-4.4] respectively). The physician role had no association of COVID-19 infection  
 161 (p-value 0.09). Patient with Diabetes and bronchial asthma, were more prone to develop COVID-  
 162 19 infection (n (%), p-value, 95%CI 20[90.9], <0.001, 15.3[3.5-67] and 37 [55.2], 0.03, 1.9[1.1-  
 163 3.2] respectively (Table 1).

164 **Table 1: Demography and the co-morbidities of the survey physicians**

| Characteristics                         | Total populations<br>n=342 | COVID positive *<br>n=146(42.7) | COVID negative †<br>n=196(57.3) | P-value | 95% CI       |
|-----------------------------------------|----------------------------|---------------------------------|---------------------------------|---------|--------------|
| Age Mean (SD)                           | 33.8(6)                    | 34.9(6.7)                       | 33.1(5.3)                       | 0.006‡  |              |
| <b>Age group</b>                        |                            |                                 |                                 |         |              |
| <40 years, n (%)                        | 288(84.2)                  | 113(39.2)                       | 175(60.8)                       | 0.004§  | 2.4(1.3-4.4) |
| ≥40 years, n (%)                        | 54(15.8)                   | 33(61.1)                        | 21(38.9)                        |         |              |
| <b>Sex</b>                              |                            |                                 |                                 |         |              |
| Male n (%)                              | 181(52.9)                  | 107(59.1)                       | 74(40.9)                        | <0.001§ | 4.5(2.8-7.2) |
| Female n (%)                            | 261(47.1)                  | 39(24.2)                        | 122(75.8)                       |         |              |
| <b>Role in clinical practice</b>        |                            |                                 |                                 |         |              |
| Supervision                             | 14(4.1)                    | 9(64.3)                         | 5(35.7)                         | 0.09§   |              |
| Clinical round                          | 22(6.4)                    | 6(27.3)                         | 16(72.7)                        |         |              |
| Receiving and follow-up of the patients | 306(89.5)                  | 131(42.8)                       | 175(57.2)                       |         |              |
| <b>Co-morbidities</b>                   |                            |                                 |                                 |         |              |



|                                                                                                                                                                                                                                                |          |          |          |        |                 |
|------------------------------------------------------------------------------------------------------------------------------------------------------------------------------------------------------------------------------------------------|----------|----------|----------|--------|-----------------|
| Hypertension                                                                                                                                                                                                                                   | 37(10.8) | 7(18.9)  | 30(81.1) | 0.002  | 0.28(0.12-0.65) |
| Diabetes                                                                                                                                                                                                                                       | 22(6.4)  | 20(90.9) | 2(9.1)   | <0.001 | 15.3(3.5-67)    |
| Asthma                                                                                                                                                                                                                                         | 67(19.6) | 37(55.2) | 30(44.8) | 0.03   | 1.9(1.1-3.2)    |
| Hypothyroidism                                                                                                                                                                                                                                 | 23(6.7)  | 14(60.9) | 9(30.1)  | 0.08   | 2.2(0.9-5.2)    |
| <p>*-Those who were positive for RT-PCR for COVID-19 for at least one time till the survey period<br/> †- those who still do not have RT-PCR positivity for COVID-19 till the survey period<br/> ‡-unpaired t test<br/> §- chi-square test</p> |          |          |          |        |                 |

165

166 **Vaccination status:**

167 Two-thirds of the study participants were vaccinated (a total of 225[65.8%] physicians fully  
168 vaccinated, and 19[5.6%] were partially vaccinated).

169 **COVID-19 experience:**

170 Total 146(42%) respondents had COVID-19 infection, and among them, 50(34.2%) had Re-  
171 detectable positive (RP) SARS-CoV-2 infection. Most of them experience mild (77[52.7]) to  
172 moderate (41[28.1]) symptoms. About 15% were asymptomatic, and 2% were critical. About  
173 one-third of the patient received only home treatment. The hospital and ICU admissions were  
174 86(58.9%) and 20 (13.7%), respectively. Most of the respondents [84[57.6%]) acquired infection  
175 within 7-14 days after a COVID roaster completion. The symptoms remained persistent for 7-14  
176 days in 59(40.1%) among the COVID-19 affected respondents. In 81(55.5%) of the COVID-19  
177 infection, the RT-PCR became negative within 14 days (Table-2).

178 **Table 2: COVID-19 and post COVID-19 state experience of the physicians**

| Trait | Number (%) |
|-------|------------|
|-------|------------|

|                                                                                             |           |
|---------------------------------------------------------------------------------------------|-----------|
| <b>COVID-19 infection * status</b>                                                          |           |
| COVID-19 positivity(n=342)                                                                  | 146(42.7) |
| Single COVID-19 infection                                                                   | 96(65.8)  |
| Re-detectable positive (RP) SARS-CoV-2 infection †                                          | 50(34.2)  |
| <b>COVID-19 disease severity(n=146)</b>                                                     |           |
| Asymptomatic ‡                                                                              | 22(15.1)  |
| Mild §                                                                                      | 77(52.7)  |
| Moderate                                                                                    | 41(28.1)  |
| Severe ¶                                                                                    | 3(2.1)    |
| Critical **                                                                                 | 3(2.1)    |
| <b>Treatment receiving place (n=146)</b>                                                    |           |
| Home treatment                                                                              | 40(27.4)  |
| Hospitalized in general ward/Cabin                                                          | 86(58.9)  |
| Hospitalized in ICU/High flow oxygen/HDU                                                    | 20(13.7)  |
| <b>The interval between the completion of the COVID duty and COVID-19 positivity(n=146)</b> |           |
| <7 days                                                                                     | 37(25.3)  |
| 7-14 days                                                                                   | 84(57.5)  |
| >14 days                                                                                    | 25(17.1)  |
| <b>Number of days required to become symptom-free</b>                                       |           |
| Asymptomatic                                                                                | 22(15.1)  |
| <7 days                                                                                     | 40(27.4)  |
| 7-14 days                                                                                   | 59(40.4)  |
| >14 days                                                                                    | 25(17.1)  |
| <b>Number of days required to become RT-PCR negative for COVID-19(n=146)</b>                |           |
| Missing ††                                                                                  | 27(18.5)  |
| <7 days                                                                                     | 18(12.3)  |

|                                                                                                                                                                                                                                                                                                                                                                                                                                                                                                                                                                                                                                                                                                                       |           |
|-----------------------------------------------------------------------------------------------------------------------------------------------------------------------------------------------------------------------------------------------------------------------------------------------------------------------------------------------------------------------------------------------------------------------------------------------------------------------------------------------------------------------------------------------------------------------------------------------------------------------------------------------------------------------------------------------------------------------|-----------|
| 7-14 days                                                                                                                                                                                                                                                                                                                                                                                                                                                                                                                                                                                                                                                                                                             | 63(43.2)  |
| >14 days                                                                                                                                                                                                                                                                                                                                                                                                                                                                                                                                                                                                                                                                                                              | 38(26)    |
| Post COVID State                                                                                                                                                                                                                                                                                                                                                                                                                                                                                                                                                                                                                                                                                                      | 101(29.5) |
| <b>Post COVID-19 symptoms ††</b>                                                                                                                                                                                                                                                                                                                                                                                                                                                                                                                                                                                                                                                                                      |           |
| Post-COVID fatigue ***                                                                                                                                                                                                                                                                                                                                                                                                                                                                                                                                                                                                                                                                                                | 98(67.1)  |
| Post COVID cough †††                                                                                                                                                                                                                                                                                                                                                                                                                                                                                                                                                                                                                                                                                                  | 21(14.4)  |
| Post-COVID exertional dyspnea †††                                                                                                                                                                                                                                                                                                                                                                                                                                                                                                                                                                                                                                                                                     | 18(12.3)  |
| Post-COVID adjustment disorder §§§                                                                                                                                                                                                                                                                                                                                                                                                                                                                                                                                                                                                                                                                                    | 24(16.4)  |
| Post-COVID memory disturbances ††††                                                                                                                                                                                                                                                                                                                                                                                                                                                                                                                                                                                                                                                                                   | 4(2.7)    |
| Post-COVID sleep disturbances ¶¶¶                                                                                                                                                                                                                                                                                                                                                                                                                                                                                                                                                                                                                                                                                     | 66(45.2)  |
| <b>Infection control measures</b>                                                                                                                                                                                                                                                                                                                                                                                                                                                                                                                                                                                                                                                                                     |           |
| <b>Type of protection used during the COVID-19 duty period (total 313 responded)</b>                                                                                                                                                                                                                                                                                                                                                                                                                                                                                                                                                                                                                                  |           |
| Full PPE ****                                                                                                                                                                                                                                                                                                                                                                                                                                                                                                                                                                                                                                                                                                         | 290(84.8) |
| Only mask                                                                                                                                                                                                                                                                                                                                                                                                                                                                                                                                                                                                                                                                                                             | 3(0.9)    |
| Mask with face shield                                                                                                                                                                                                                                                                                                                                                                                                                                                                                                                                                                                                                                                                                                 | 4(1.2)    |
| Mask with single time gown                                                                                                                                                                                                                                                                                                                                                                                                                                                                                                                                                                                                                                                                                            | 16(4.7)   |
| <b>Type of the mask used during the COVID-19 duty period (total 313 responded)</b>                                                                                                                                                                                                                                                                                                                                                                                                                                                                                                                                                                                                                                    |           |
| N-95 ††††                                                                                                                                                                                                                                                                                                                                                                                                                                                                                                                                                                                                                                                                                                             | 304(88.9) |
| KN-95                                                                                                                                                                                                                                                                                                                                                                                                                                                                                                                                                                                                                                                                                                                 | 5(1.5)    |
| Surgical mask                                                                                                                                                                                                                                                                                                                                                                                                                                                                                                                                                                                                                                                                                                         | 4(1.2)    |
| <p>*-Positive for RT-PCR<br/> †- Recurrence of the symptoms and RT-PCR test positivity after the full clinical recovery and RT-PCR negativity from an episode of COVID-19 disease.<br/> ‡- RT-PCR for COVID-19 was positive, but there were no symptoms.<br/> §- RT-PCR positive for COVID-19 with symptoms except for respiratory distress and SPO2 more than 93 %.<br/>   - RT-PCR positive for COVID-19 with respiratory distress and SPO2 more than 93 %.<br/> ¶- RT-PCR positive for COVID-19 with respiratory distress and SPO2 less than 93 %.<br/> **- RT-PCR positive for COVID-19 and who required ICU/HDU admission or high flow oxygen therapy<br/> ††-The responder did not respond to this question</p> |           |

‡‡-a wide range of new, returning, or ongoing health problems people can experience **four or more weeks** after first being infected with the virus that causes COVID-19.

\*\*\*- A substantial reduction or impairment in the ability to engage in pre-illness levels of occupational, educational, social, or personal activities accompanied by profound fatigue

†††- Coughing for >1 h or  $\geq 3$  coughing episodes in 24 h

‡‡‡- Perception of respiratory discomfort that occurs for an activity level that does not normally lead to breathing discomfort

§§§- Emotional or behavioral symptoms occurring within 3 months of a stressor and lasting  $\geq 6$  months after the stressor or its consequences end

|||||- Pathological partial or complete loss of the ability to recall past experiences (retrograde amnesia) or to form new memories (anterograde amnesia).

¶¶¶- Persistent difficulty with sleep initiation, duration, consolidation, or quality

\*\*\*\*- a Mask along with other protective equipment for protection of other parts of the body which includes a coverall and or face shield or goggles

††††-N95 (3M) models like 8210, 1860

179

## 180 **Post-COVID-19 experiences:**

181 Total 101(29.5%) also suffered in the post-COVID-19 state. Most of them suffered from post-  
182 COVID fatigue 98(67.6%). It was followed by post-COVID sleep disturbances 66(45.2%), post-  
183 COVID adjustment disorders 24(16.4%), post-COVID cough 21(14.3%), and post-COVID  
184 exertional dyspnea18(12.3%). (Table 2)

## 185 **Risk factors for COVID-19, severe COVID, and Re-detectable positive (RP) SARS-CoV-2** 186 **infection:**

187 Increasing age (OR, 95%CI, p-value; 1.15, 1.05-1.25, 0.002), male sex (OR, 95%CI, p-value;  
188 5.8, 3.2-9.8, <0.001), and diabetes (OR, 95%CI, p-value; 25.6, 2-327.2, 0.01) were the risk factor  
189 of having COVID-19.

190 Younger age group and those had bronchial asthma had developed critical disease. (OR, 95%CI,  
191 p-value; 0.8, 0.74—0.92, 0.001; 2.01, 1.3-3.1, 0.002 respectively).

192 Female sex and the diabetes were the risk factors for Re-detectable positive (RP) SARS-CoV-2  
 193 infection. (OR, 95%CI, p-value; 0.24, 0.09-0.67, 0.006; 44, 8.9-218.7, <0.001 respectively).  
 194 (Table 3).

195 **Table 3: Risk factors for COVID-19, severe COVID, and Re-detectable positive (RP)**  
 196 **SARS-CoV-2 infection**

| Trait                                                                                                                                                                                                                                                                                                                                                                                                                                       | B     | SE   | wald | P-value | OR   | 95%CI     |
|---------------------------------------------------------------------------------------------------------------------------------------------------------------------------------------------------------------------------------------------------------------------------------------------------------------------------------------------------------------------------------------------------------------------------------------------|-------|------|------|---------|------|-----------|
| <b>COVID-19 *</b>                                                                                                                                                                                                                                                                                                                                                                                                                           |       |      |      |         |      |           |
| age                                                                                                                                                                                                                                                                                                                                                                                                                                         | 0.14  | 0.04 | 9.9  | 0.002   | 1.15 | 1.05-1.25 |
| Sex                                                                                                                                                                                                                                                                                                                                                                                                                                         | 1.7   | 0.29 | 35.6 | <0.001  | 5.6  | 3.2-9.8   |
| Physicians' role                                                                                                                                                                                                                                                                                                                                                                                                                            | 1.3   | 0.58 | 5.2  | 0.02    | 3.8  | 1.2-11.8  |
| Hypertension                                                                                                                                                                                                                                                                                                                                                                                                                                | -1.7  | 0.78 | 4.6  | 0.32    | 0.19 | 0.04-0.9  |
| Diabetes                                                                                                                                                                                                                                                                                                                                                                                                                                    | 3.2   | 1.3  | 6.2  | 0.01    | 25.6 | 2-327.4   |
| Constant                                                                                                                                                                                                                                                                                                                                                                                                                                    | -9.8  | 3.1  | 9.9  | 0.002   | 0.00 |           |
| <b>Critical and non-critical COVID state †</b>                                                                                                                                                                                                                                                                                                                                                                                              |       |      |      |         |      |           |
| Age                                                                                                                                                                                                                                                                                                                                                                                                                                         | -0.18 | 0.06 | 10.6 | 0.001   | 0.8  | 0.74-0.92 |
| Asthma                                                                                                                                                                                                                                                                                                                                                                                                                                      | 0.69  | 0.22 | 9.8  | 0.002   | 2.01 | 1.3-3.1   |
| Constant                                                                                                                                                                                                                                                                                                                                                                                                                                    | -34.7 | 6308 | 0.00 | 0.9     | 0.00 |           |
| <b>Re-detectable positive (RP) SARS-CoV-2 infection ‡</b>                                                                                                                                                                                                                                                                                                                                                                                   |       |      |      |         |      |           |
| Sex                                                                                                                                                                                                                                                                                                                                                                                                                                         | -1.4  | 0.5  | 7.6  | 0.006   | 0.24 | 0.09-0.67 |
| Diabetes                                                                                                                                                                                                                                                                                                                                                                                                                                    | 3.7   | 0.8  | 21.4 | <0.001  | 44   | 8.9-218.7 |
| Constant                                                                                                                                                                                                                                                                                                                                                                                                                                    | -0.5  | 0.4  | 1.3  | 0.52    | 0.63 |           |
| *Omnibus test of model coefficients-0.000, Nagelkerke R 0.35, Hosmer and Lemeshow test-0.00, Sensitivity 70.1.<br>†Omnibus test of model coefficients-0.000, Nagelkerke R 0.73, Hosmer and Lemeshow test-0.001, Sensitivity 87%, conditional forward method, model at step 4<br>‡Omnibus test of model coefficients-0.000, Nagelkerke R 0.56, Hosmer and Lemeshow test-0.00, Sensitivity 75.1%, conditional forward method, model at step 4 |       |      |      |         |      |           |

197

198 **The infection rate among the physicians:**

199 We observed four waves of the number of the RT-PCR tests and RT-PCR test positive in the  
 200 virology department of Dhaka medical college among the general population. The positivity rate

201 also showed the same trend. The First, second, third, and fourth surges extend from April 2020 to  
202 August 2020, September 2020 to December 2020, January 2021 to end-April 2021, and May  
203 2021 to October 2021, respectively. The RT-PCR positivity rate among the general population  
204 was high in the second, third, and fourth surges, and positivity rate are higher in the first, second  
205 and third surges than the general populations. The physicians older than 45 years had a higher  
206 RT-PCR positivity rate in the fourth surge (Figure 3).

207 **Figure 3: Surges in the number of total tests, positive cases, and positivity rate (Tested in**  
208 **the virology laboratory of Dhaka Medical College**

209

210 **Opinion of the physicians regarding COVID-19 infection among the physicians:**

211 We asked 14 different questions regarding their opinion about the possible reasons for high  
212 infectivity among the doctors. We rated the answer 1-10. The questions were about - 1. Hospital  
213 IPC measures (a. Your protective equipment is of low standard, b. Your doffing-donning area is  
214 below standard, c. Your green zone is not safe, d. Your working hour is more). 2. The behavior  
215 of the individual (a. You take Inadequate protection during the duty hour, b. You Open your  
216 mask during duty hour, c. You take snacks in the duty hour, d. You disengage mask during  
217 talking, e. You have the inadequate facility to take a shower, f. You acquired the infection from  
218 your community). 3. Personal risk (a. You have multiple co-morbidities, b. COVID-19 affection  
219 has a genetic influence)3. Viral factor (a. Your working environment has a high viral load, b. The  
220 virus is highly virulent).

221 Most of the respondents (175[76%]) consider viral virulence as a vital factor, and 116(50%)  
222 strongly agreed about high environmental viral load. The opinion about hospital IPC measures,  
223 the reply was diverse. About the standard of the equipment,126(55.2%) disagreed about its low

224 quality. Total 131(55%) disagreed about the substandard doffing-donning area, and 120 (52.9%)  
225 disagreed about the unsafety of the green zone. Most of them considered the working hour is  
226 more (71[31.4%]). (Figure 4)

#### 227 **Figure 4: Physician's Opinion about the reason for having SARS-CoV-2 infection**

228

### 229 **Discussion:**

230 In this study, we tried to illustrate the COVID-19 experiences of the physicians in different  
231 aspects in this pandemic era. Similar to the general populations, the physicians experienced  
232 similar surges during this pandemic. The positivity rate among the physicians was higher in the  
233 second to fourth surges. But they were less hospitalized in the fourth surge. Mostly they suffered  
234 either mild or moderate diseases. A number of the physicians needed hospitalization either in the  
235 general wards or the critical care settings. Increasing age, male sex, and diabetes were the risk  
236 factors of COVID-19 infection, and re-detectable positive (RP) SARS-CoV-2 infection occurred  
237 more among the female and diabetic physicians. Most physicians agreed that the high virulence  
238 and high environmental viral loads were the reason behind their illness.

239 We conducted the study among the physicians working in the Dhaka medical college. The  
240 workload and the exposure may vary from hospital to hospital. The survey population was  
241 younger. So, we cannot generalize the findings to all the physicians working in different settings  
242 and different environments. Moreover, the study population was young. We could not generalize  
243 the study findings to the general population as well.

244 Officially, there are three waves of COVID-19 infections among the general population in  
245 Bangladesh after analyzing the total reported cases [24,25, 26]. The first, second, and third  
246 waves extend from April 2020 to December 2020, February 2021 to May 2021, and June 2021 to

247 September 2021, respectively [25]. The first wave peaked in July 2020, the second wave peaked  
248 in April 2021, and the third peaked in August 2021[24,25], and the predominant SARS CoV-2  
249 variants isolated during these waves were alpha, beta, and delta, respectively [24]. But in the  
250 Dhaka Medical College Hospital, we observed four surges. The span of the official second and  
251 third COVID-19 waves was concordant with the third and fourth surges of Dhaka Medical  
252 College. The official first surge was long, and there was a small peak in October-November  
253 2020[24,25]. Officially that was not considered as a separate wave. But there was a surge of  
254 hospital admission and RT-PCR positivity among the general population and physicians in the  
255 Dhaka medical college (figure-2 and 3) at that small peak. The admission number of physicians  
256 was highest from October 2020 to December 2020, while the positivity rate was highest during  
257 April 2021. The total admission was lowest in August 2021(during the delta variant peak). In the  
258 other periods, the hospital admission was concordant with the general population. But the RT-  
259 PCR positivity rate remained higher than the general population in the first to third surge. We  
260 could explain the discordance in hospital admission during the delta variant period with  
261 vaccination. Bangladesh started its vaccination program on 27 January 2021, focusing on the  
262 physicians initially [27]. By April, most of the physicians got a second vaccine dose. It is  
263 noteworthy, in our study, the positivity rate during the delta surge was comparable with the  
264 general population, despite a low admission requirement. These findings further emphasize that  
265 vaccine breakthrough infection is less severe [28,29]. The reason behind the infection surge and  
266 admission in November-December among the physicians is unexplained, perhaps due to lifting  
267 the nationwide lockdown measure on 31 August 2020 increased the mixing among the general  
268 population and the physician [30].



269 The study population in this study is relatively young, as the study was conducted in the  
270 government hospital where the workforce in the COVID unit is young and the junior doctors.  
271 The senior doctors play mainly the supervisory role. This finding corresponds to another study  
272 conducted in another COVID-19 dedicated hospital in Dhaka [31].

273 We found a positive association of age > 40 years and male sex with SARS CoV-2 infections  
274 among the physicians. In the Update Alert 9: Epidemiology of and Risk Factors for Coronavirus  
275 Infection in Health Care Workers, no association of age and sex was found [32]. Male sex and  
276 increasing age are the established population demographic risk factors for COVID-19 infection  
277 [33]. The underlying mechanism of age and the gender influence in COVID-19 disease are  
278 largely unknown. Biological, psychological, and behavioral factors, with gender, might explain  
279 the sex differences in COVID-19 infection [34]. Male has higher plasma ACE 2 level than  
280 females [35]. Immunosenescence and multiple co-morbidity might explain the age influence in  
281 having SARS-CoV2 infection [36].

282 In this study we found diabetes and the bronchial asthma had a positive association with the  
283 COVID-19 disease. It is consistent with the CDC findings [37].

284 In this study up to September 2021, about 42% were at least one time infected with COVID-19.  
285 Among them, about one-third of patients experienced re-detectable positive (RP) SARS-CoV-2  
286 infection. Different studies found a prevalence of infection between 7-17% [37,38,39,40]. Older  
287 age, diabetes, previous severe infection, consolidation, and female sex were the risk factors  
288 found in the different studies [38,39,40]. In our study, we found female sex and diabetes as risk  
289 factors. In another study [38], high lymphocyte count and IL-6 level were associated with  
290 reinfection. Re-detectable positive (RP) SARS-CoV-2 infection might be due to reinfection or  
291 reactivation [23]. In this study, we did not assess whether it was reinfection or reactivation.

292 About half of the affected physicians had only mild disease. Most of them became positive  
293 within 7-14 days after ending a duty roster, and most of them remained symptomatic for 7-14  
294 days. These findings were concordant with the incubation period and the duration of illness in  
295 the general population [41]. Their sufferings in post-COVID state corresponds with our previous  
296 study [17].

297 IPC measure was not directly assessed in this study. But we made some indirect assessments.  
298 More than 85% of the respondents used full PPE and N 95 masks during the duty period. They  
299 expressed their mixed experiences about the doffing-donning area and green zone (figure 4).

300 This study had several limitations. It was done in a single-center, so it is not representative of the  
301 scenario of the whole country. It was a retrograde study, so there might have been some recall  
302 bias. The hospital admission and the test capacity are bed or slot limited. So, the hospital  
303 admission rate and the number of tests in different surges might not be the actual representation  
304 of the nation's scenario. A multi-center study is required to get a representative picture.

### 305 **Conclusions:**

306 The physicians had a higher positivity rate in the different waves than the general population. A  
307 significant number of the COVID-warrior became positive for SARS-CoV-2 and had re-  
308 detectable positive (RP) SARS-CoV-2 infection.

309 **Acknowledgement:** The Physicians who participated in the survey.

310 **Ethical Approval:** The ethical approval was obtained from Ethical Review Committee of Dhaka  
311 Medical College. (ERC-DMC/ECC/2021/399)

312 **Conflict of Interest:** Nothing to declare

313 **Funding:** Non-funded

314

315 **References:**

- 316 1. WHO. (2020, February 11). *Naming the coronavirus disease (COVID-19) and the virus*  
317 *that causes it*. Retrieved January 20, 2021, from WHO:  
318 [https://www.who.int/emergencies/diseases/novel-coronavirus-2019/technical-](https://www.who.int/emergencies/diseases/novel-coronavirus-2019/technical-guidance/naming-the-coronavirus-disease-(covid-2019)-and-the-virus-that-causes-it)  
319 [guidance/naming-the-coronavirus-disease-\(covid-2019\)-and-the-virus-that-causes-it](https://www.who.int/emergencies/diseases/novel-coronavirus-2019/technical-guidance/naming-the-coronavirus-disease-(covid-2019)-and-the-virus-that-causes-it).
- 320 2. WHO. (2020, January 10). *GCM teleconference on Pneumonia of unknown etiology in*  
321 *Wuhan, China – Note for the Records - 10 January 2020*. Retrieved January 20, 2021,  
322 from World Health Organization: <https://www.who.int/blueprint/10-01-2020-nfr-gcm.pdf>.
- 323 3. Zhao S, Lin Q, Ran J, Musa SS, Yang G, Wang W, Lou Y, Gao D, Yang L, He D, Wang  
324 MH. Preliminary estimation of the basic reproduction number of novel coronavirus  
325 (2019-nCoV) in China, from 2019 to 2020: A data-driven analysis in the early phase of  
326 the outbreak. *Int J Infect Dis*. 2020 Mar; 92:214-217. doi: 10.1016/j.ijid.2020.01.050.  
327 Epub 2020 Jan 30. PMID: 32007643; PMCID: PMC7110798.
- 328 4. WHO Director-General's opening remarks. (2020, March 11). *WHO Director-General's*  
329 *opening remarks at the media briefing on COVID-19 - 11 March 2020*. Retrieved January  
330 20, 2021, from WHO: [https://www.who.int/director-general/speeches/detail/who-](https://www.who.int/director-general/speeches/detail/who-director-general-s-opening-remarks-at-the-media-briefing-on-covid-19---11-march-2020)  
331 [director-general-s-opening-remarks-at-the-media-briefing-on-covid-19---11-march-2020](https://www.who.int/director-general/speeches/detail/who-director-general-s-opening-remarks-at-the-media-briefing-on-covid-19---11-march-2020).
- 332 5. Countries where COVID-19 has spread. Retrieved on July 27, 2021 from worldometers:  
333 [https:// www. worldometers.info/coronavirus/countries-where-coronavirus-has-spread/](https://www.worldometers.info/coronavirus/countries-where-coronavirus-has-spread/)
- 334 6. Dalglish SL. COVID-19 gives the lie to global health expertise. *Lancet*.  
335 2020;395(10231):1189. doi:10.1016/S0140-6736(20)30739-X
- 336 7. Bandyopadhyay S, Baticulon RE, Kadhum M, et al. Infection and mortality of healthcare  
337 workers worldwide from COVID-19: a systematic review. *BMJ Glob Health*.

- 338 2020;5(12):e003097. doi:10.1136/bmjgh-2020-003097).
- 339 8. Li Wenliang: Coronavirus kills Chinese whistleblower doctor, retrieved from  
340 <https://www.bbc.com/news/world-asia-china-51403795>. Accessed 30 September, 2021.
- 341 9. Amnesty International. (2020, September 3). *Amnesty International*. Retrieved January  
342 20, 2021, from Amnesty International:  
343 [https://www.amnesty.org/en/latest/news/2020/09/amnesty-analysis-7000-health-workers-](https://www.amnesty.org/en/latest/news/2020/09/amnesty-analysis-7000-health-workers-have-died-from-covid19/)  
344 [have-died-from-covid19/](https://www.amnesty.org/en/latest/news/2020/09/amnesty-analysis-7000-health-workers-have-died-from-covid19/)
- 345 10. Institute of Epidemiology Disease Control and Research (IEDCR). Bangladesh Covid-19  
346 update. 2020. Available from: <https://www.iedcr.gov.bd/>
- 347 11. COVID-19 dashboard from DGHS, Bangladesh. Available from  
348 [https://dghs.gov.bd/index.php/en/component/content/article/81-english-root/5565-2020-](https://dghs.gov.bd/index.php/en/component/content/article/81-english-root/5565-2020-10-18-08-30-38)  
349 [10-18-08-30-38](https://dghs.gov.bd/index.php/en/component/content/article/81-english-root/5565-2020-10-18-08-30-38)
- 350 12. COVID-19 bed status dashboard, 2021. Available from  
351 <http://103.247.238.92/webportal/pages/covid19-bedstatus.php>.
- 352 13. DMCH burn unit starts admitting Covid-19 patients published on 2 May 2020. retrieved  
353 on 27 July 2021 from the business standard: [https://www.tbsnews.net/coronavirus-](https://www.tbsnews.net/coronavirus-chronicle/covid-19-bangladesh/dmch-burn-unit-starts-admitting-covid-19-patients-76384)  
354 [chronicle/covid-19-bangladesh/dmch-burn-unit-starts-admitting-covid-19-patients-76384](https://www.tbsnews.net/coronavirus-chronicle/covid-19-bangladesh/dmch-burn-unit-starts-admitting-covid-19-patients-76384)
- 355 14. World Health Organization. *Bangladesh*.  
356 2012. <https://www.who.int/workforcealliance/countries/bgd/en/>. Accessed Oct 3, 2021.
- 357 15. Hussain M, Begum T, Batul SA, Tui NN, Islam MN, Hussain B. Healthcare workers  
358 during the COVID-19 pandemic: Experiences of doctors and nurses in Bangladesh. *Int J*  
359 *Health Plann Manage*. 2021; 36(S1):174-181. doi:10.1002/hpm.3154.

- 360 16. 121 doctors die with Covid-19 in Bangladesh. Accessed Oct 10, 2021. Retrieved from  
361 <https://www.risingbd.com/english/national/news/76241>.
- 362 17. Mahmud R, Rahman MM, Rassel MA, Monayem FB, Sayeed SKJB, Islam MS, Islam  
363 MM. Post-COVID-19 syndrome among symptomatic COVID-19 patients: A prospective  
364 cohort study in a tertiary care center of Bangladesh. PLoS One. 2021 Apr 8;  
365 16(4):e0249644. doi: 10.1371/journal.pone.0249644. PMID: 33831043; PMCID:  
366 PMC8031743.
- 367 18. Rational use of personal protective equipment for coronavirus disease (COVID-19) and  
368 considerations during severe shortages Interim guidance 6 April 2020. Retrieved July 16,  
369 2021, from WHO:\*WHO-2019-nCov-IPC\_PPE\_use-2020.3-eng.pdf.
- 370 19. Job descriptions of the staff working under director general of health, Bangladesh.  
371 Retrived January, 30, 2021 from [http://hospitaldghs.gov.bd/wp-content/uploads/2019/](http://hospitaldghs.gov.bd/wp-content/uploads/2019/11/Job_DESCRIPTION-DGHS)  
372 [11/Job\\_DESCRIPTION-DGHS](http://hospitaldghs.gov.bd/wp-content/uploads/2019/11/Job_DESCRIPTION-DGHS).
- 373 20. National Guidelines on Clinical Management of Coronavirus Disease 2019 (Covid-19),  
374 27 May, 2020 [https://dghs.gov.bd/images/docs/Guideline/COVID\\_Guideline.pdf](https://dghs.gov.bd/images/docs/Guideline/COVID_Guideline.pdf).
- 375 21. WHO guidance on management of severe acute respiratory infection (SARI) when  
376 COVID19 is suspected; [https://www.who.int/publications-detail/clinical-management-of-](https://www.who.int/publications-detail/clinical-management-of-severe-acute-respiratoryinfection-when-novel-coronavirus-(ncov)-infection-is-suspected)  
377 [severe-acute-respiratoryinfection-when-novel-coronavirus-\(ncov\)-infection-is-suspected](https://www.who.int/publications-detail/clinical-management-of-severe-acute-respiratoryinfection-when-novel-coronavirus-(ncov)-infection-is-suspected).
- 378 22. Post COVID conditions. Retrieved from [https://www.cdc.gov/coronavirus/2019-](https://www.cdc.gov/coronavirus/2019-ncov/long-term-effects/index.html)  
379 [ncov/long-term-effects/index.html](https://www.cdc.gov/coronavirus/2019-ncov/long-term-effects/index.html). Accessed 10 October, 2021.
- 380 23. Adrielle Dos Santos L, Filho PGG, Silva AMF, Santos JVG, Santos DS, Aquino MM, de  
381 Jesus RM, Almeida MLD, da Silva JS, Altmann DM, Boyton RJ, Alves Dos Santos C,  
382 Santos CNO, Alves JC, Santos IL, Magalhães LS, Belitardo EMMA, Rocha DJPG,

- 383 Almeida JPP, Pacheco LGC, Aguiar ERGR, Campos GS, Sardi SI, Carvalho RH, de  
384 Jesus AR, Rezende KF, de Almeida RP. Recurrent COVID-19 including evidence of  
385 reinfection and enhanced severity in thirty Brazilian healthcare workers. *J Infect.* 2021  
386 Mar;82(3):399-406. doi: 10.1016/j.jinf.2021.01.020. Epub 2021 Feb 13. PMID:  
387 33589297; PMCID: PMC7880834.
- 388
- 389 24. Statistics of the COVID-19 pandemic in Bangladesh. Retrieved from  
390 [https://en.wikipedia.org/wiki/Statistics\\_of\\_the\\_COVID-19\\_pandemic\\_in\\_Bangladesh](https://en.wikipedia.org/wiki/Statistics_of_the_COVID-19_pandemic_in_Bangladesh).  
391 Accessed 3 November, 2021.
- 392 25. Ahammad I, Hossain MU, Rahman A, Chowdhury ZM, Bhattacharjee A, Das KC, et al.  
393 (2021) Wave-wise comparative genomic study for revealing the complete scenario and  
394 dynamic nature of COVID-19 pandemic in Bangladesh. *PLoS ONE* 16(9): e0258019.  
395 <https://doi.org/10.1371/journal.pone.0258019>
- 396 26. Saha S, Tanmoy AM, Tanni AA, *et al.* new waves, new variants, old inequity: a  
397 continuing COVID-19 crisis *BMJ Global Health* 2021;6: e007031.
- 398 27. "A historic day". *The Daily Star*. 28 January 2021
- 399 28. Lopez Bernal J, Andrews N, Gower C, et al. Effectiveness of the Pfizer-BioNTech and  
400 Oxford-AstraZeneca vaccines on covid-19 related symptoms, hospital admissions, and  
401 mortality in older adults in England: test negative case-control study. *BMJ*. 2021;373:  
402 n1088. Published 2021 May 13. doi:10.1136/bmj. n1088.
- 403 29. The Possibility of COVID-19 after Vaccination: Breakthrough Infections, from  
404 [https://www.cdc.gov/coronavirus/2019-ncov/vaccines/effectiveness/why-measure-](https://www.cdc.gov/coronavirus/2019-ncov/vaccines/effectiveness/why-measure-effectiveness/breakthrough-cases.html)  
405 [effectiveness/breakthrough-cases.html](https://www.cdc.gov/coronavirus/2019-ncov/vaccines/effectiveness/why-measure-effectiveness/breakthrough-cases.html)

- 406 30. The Business Standard. August 3rd, 2020. [https://tbsnews.net/bangladesh/restriction-](https://tbsnews.net/bangladesh/restriction-public-movements-extended-till-aug-31-114871)  
407 [public-movements-extended-till-aug-31-114871](https://tbsnews.net/bangladesh/restriction-public-movements-extended-till-aug-31-114871)
- 408 31. Yasmin, R., Parveen, R., Azad, N. A., Deb, S. R., Paul, N., Haque, M. M., Haque, M. A.,  
409 & Azad, S. (2020). Corona Virus Infection among Healthcare Workers in a COVID  
410 Dedicated Tertiary Care Hospital in Dhaka, Bangladesh. *Journal of Bangladesh College*  
411 *of Physicians and Surgeons*, 38, 43–49. <https://doi.org/10.3329/jbcps.v38i0.47442>
- 412 32. Chou R, Dana T, Selph S, Totten AM, Buckley DI, Fu R. Update Alert 9: Epidemiology  
413 of and Risk Factors for Coronavirus Infection in Health Care Workers. *Ann Intern Med*.  
414 2021;174(7):W63-W64. doi:10.7326/L21-0302.
- 415 33. Pijls BG, Jolani S, Atherley A, Derckx RT, Dijkstra JIR, Franssen GHL, Hendriks S,  
416 Richters A, Venemans-Jellema A, Zalpuri S, Zeegers MP. Demographic risk factors for  
417 COVID-19 infection, severity, ICU admission and death: a meta-analysis of 59 studies.  
418 *BMJ Open*. 2021 Jan 11;11(1):e044640. doi: 10.1136/bmjopen-2020-044640. PMID:  
419 33431495; PMCID: PMC7802392.
- 420 34. Griffith DM, Sharma G, Holliday CS, Enyia OK, Valliere M, Semlow AR, et al. Men  
421 and COVID-19: A Biopsychosocial Approach to Understanding Sex Differences in  
422 Mortality and Recommendations for Practice and Policy Interventions. *Prev Chronic Dis*  
423 2020;17:200247. DOI: <http://dx.doi.org/10.5888/pcd17.200247>
- 424 35. Sama IE, Ravera A, Santema BT, van Goor H, Ter Maaten JM, Cleland JGF, et al.  
425 Circulating plasma concentrations of angiotensin-converting enzyme 2 in men and  
426 women with heart failure and effects of renin-angiotensin-aldosterone inhibitors. *Eur*  
427 *Heart J* 2020;41(19):1810–7.

- 428 36. Mueller AL, McNamara MS, Sinclair DA. Why does COVID-19 disproportionately  
429 affect older people? *Aging (Albany NY)*. 2020;12(10):9959-9981.  
430 doi:10.18632/aging.103344
- 431 37. [https://www.cdc.gov/coronavirus/2019-ncov/need-extra-precautions/people-with-](https://www.cdc.gov/coronavirus/2019-ncov/need-extra-precautions/people-with-medical-conditions.html)  
432 [medical-conditions.html](https://www.cdc.gov/coronavirus/2019-ncov/need-extra-precautions/people-with-medical-conditions.html)
- 433 38. Gao C, Zhu L, Jin CC, Tong YX, Xiao AT, Zhang S. Prevalence and impact factors of  
434 recurrent positive SARS-CoV-2 detection in 599 hospitalized COVID-19 patients. *Clin*  
435 *Microbiol Infect*. 2021 Feb 9;27(5): 785.e1–7. doi: 10.1016/j.cmi.2021.01.028. Epub  
436 ahead of print. PMID: 33571662; PMCID: PMC7870438.
- 437 39. Chen J, Xu X, Hu J, et al. Clinical course and risk factors for recurrence of positive  
438 SARS-CoV-2 RNA: a retrospective cohort study from Wuhan, China [published online  
439 ahead of print, 2020 Sep 10]. *Aging (Albany NY)*. 2020;12(17):16675-16689.  
440 doi:10.18632/aging.103795
- 441 40. Tang X, Musa SS, Zhao S, He D. Reinfection or Reactivation of Severe Acute  
442 Respiratory Syndrome Coronavirus 2: A Systematic Review. *Front Public Health*. 2021  
443 Jun 11; 9:663045. doi: 10.3389/fpubh.2021.663045. PMID: 34178920; PMCID:  
444 PMC8226004.
- 445 41. Symptoms of Novel Coronavirus (2019-nCoV) – CDC. From  
446 <https://www.cdc.gov/coronavirus/2019-ncov/symptoms-testing/symptoms.html>.  
447 Accessed 01 December, 2021.
- 448
- 449



450

451

452

453

454

455

456

457

458

459

460

461

462

463

464

465

466

467

468

469

470

471

472

473

474

475

476

477

478

479

480

481

482

483

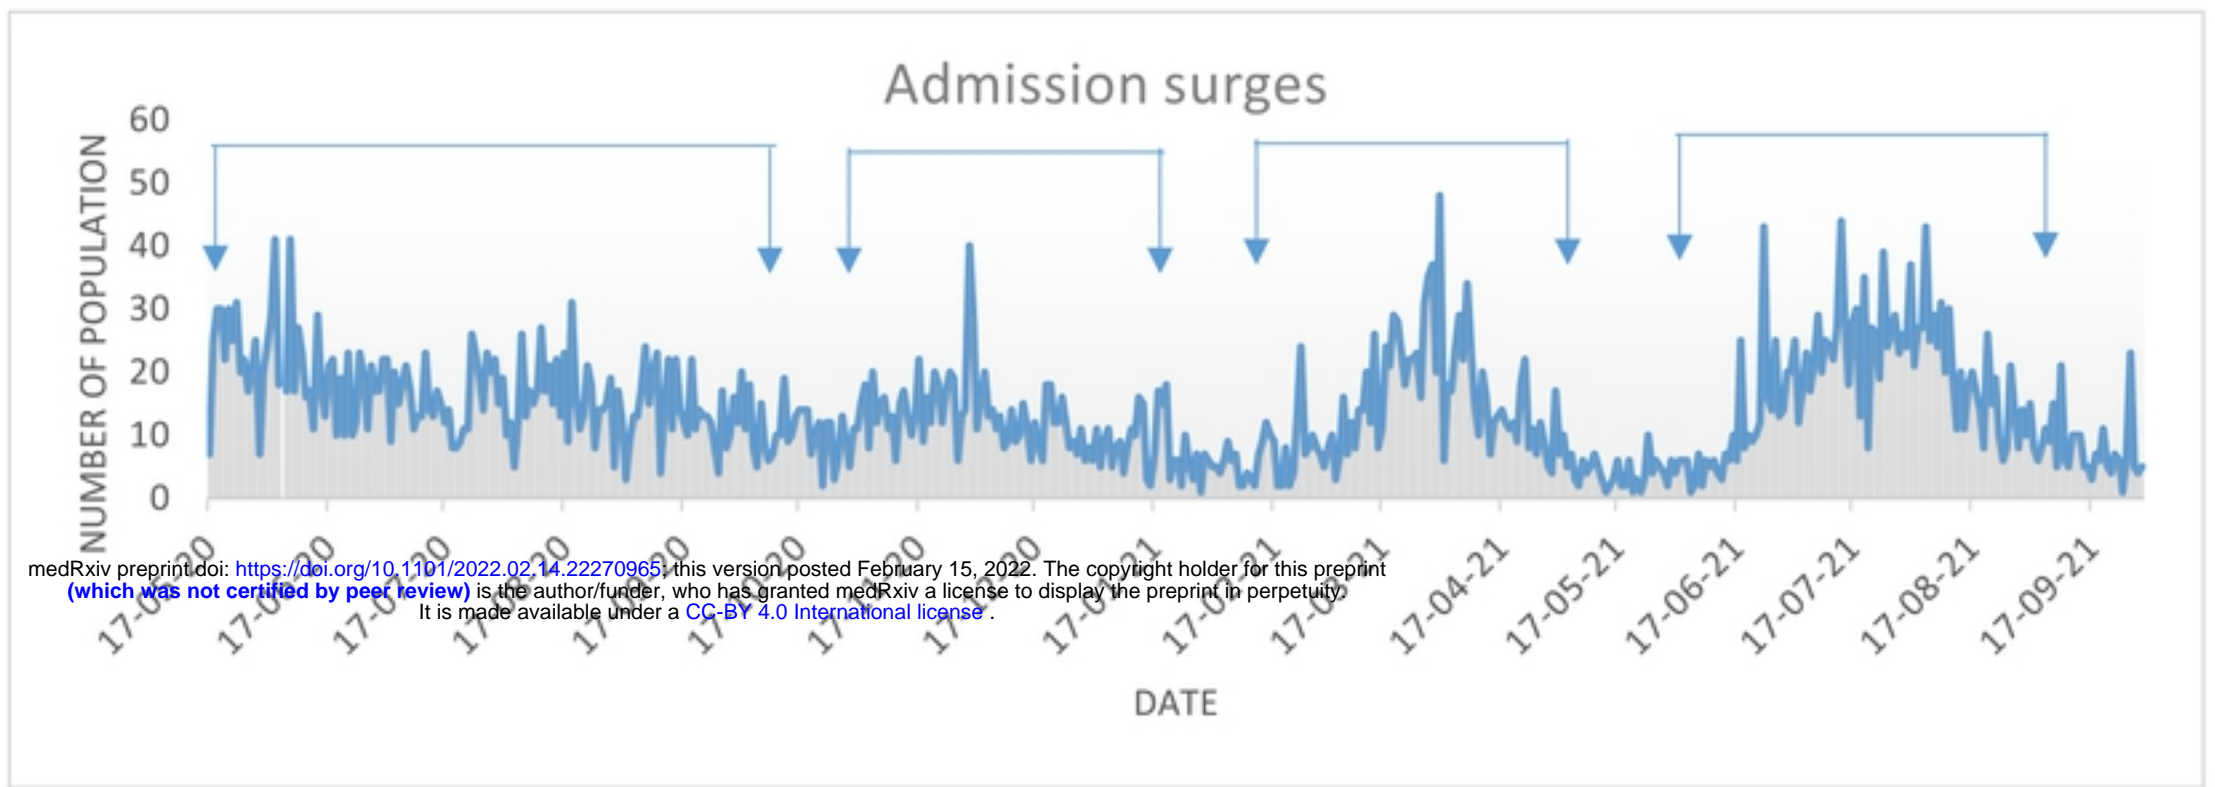

Figure 2 a

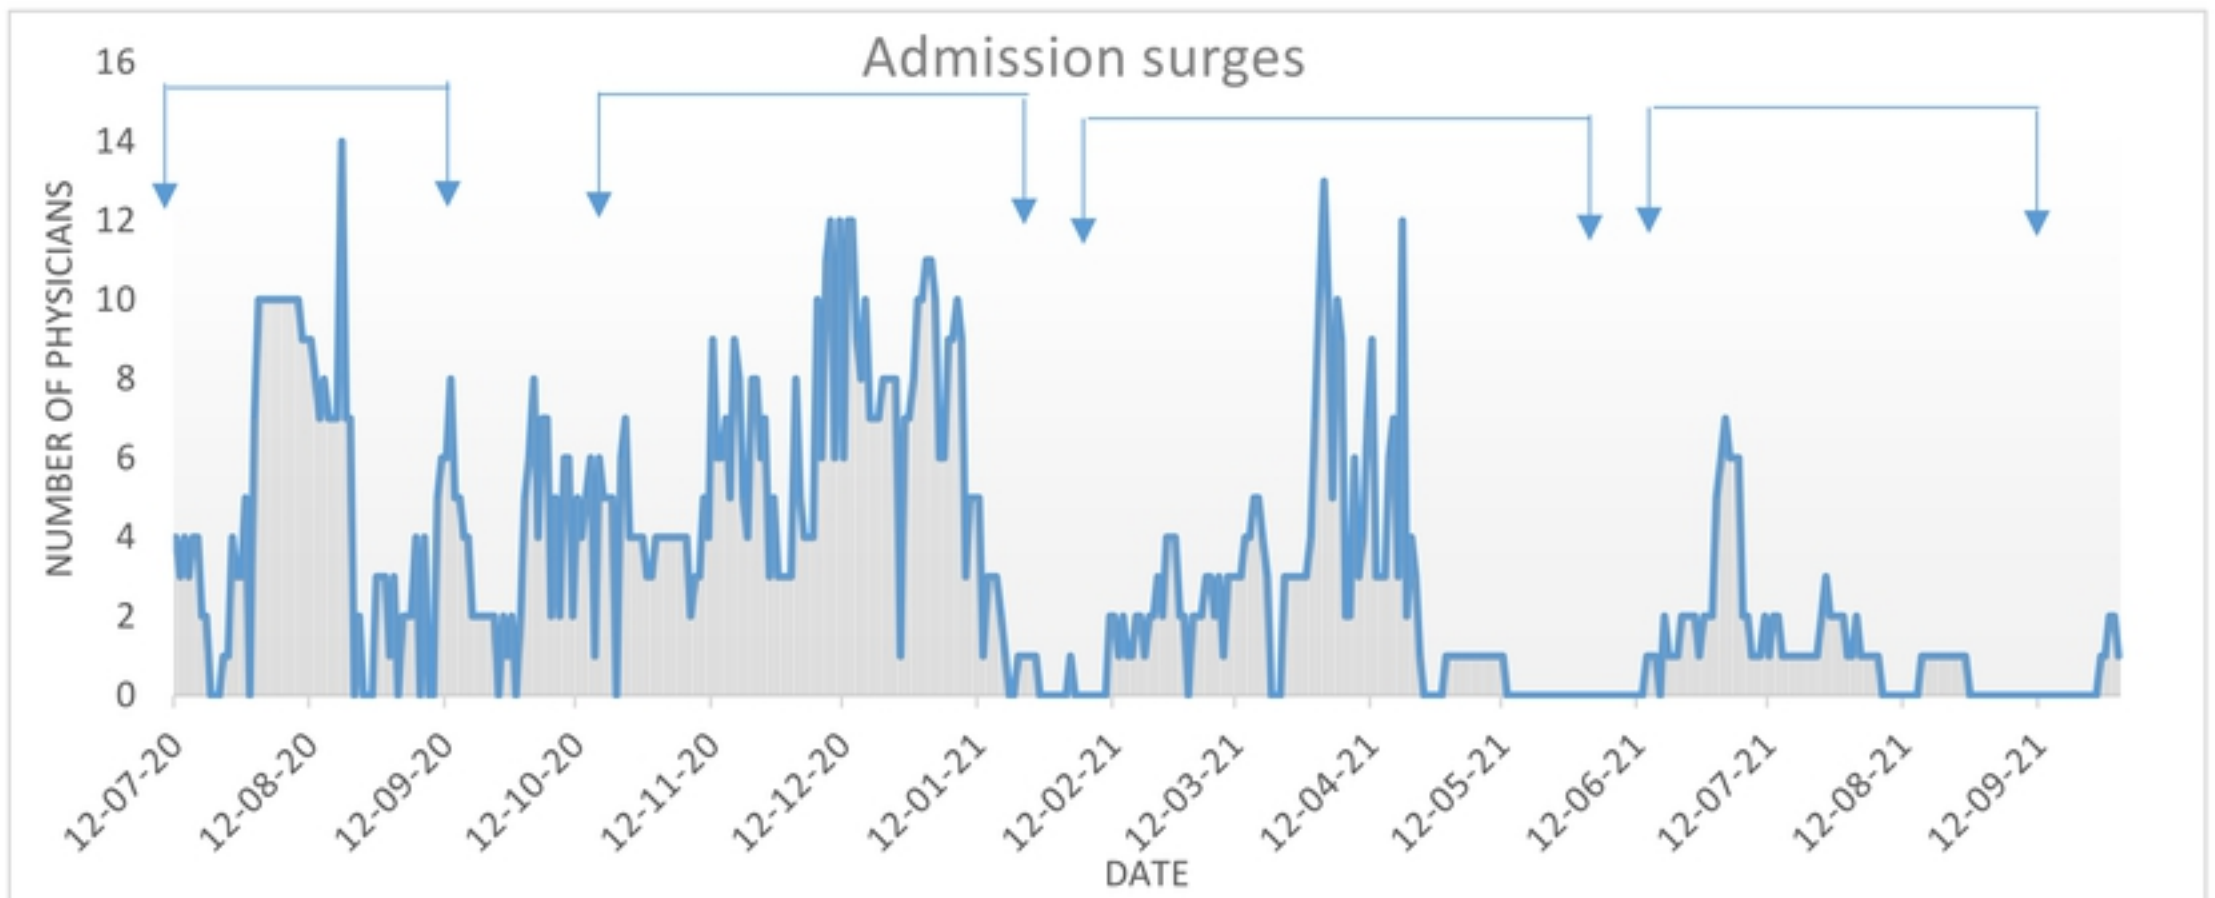

Figure 2b

Figure 2: Hospital admission surges among the general population, nurses, and physicians

2 a. Surges of hospital admission among the general population. There were four surges of hospital admission among the general population during the period extending from May 2020 to September 2021. The first, second, third, and fourth surge extended from May 2020 to mid-October 2020, mid-November 2020 to mid-January 2021, mid-February 2021 to mid-April 2021, and mid-June 2021 to mid-October 2021, respectively.

2 b. Surges of hospital admission among physicians. The physicians also observed four hospital admission surges, but the peak was low in the fourth.

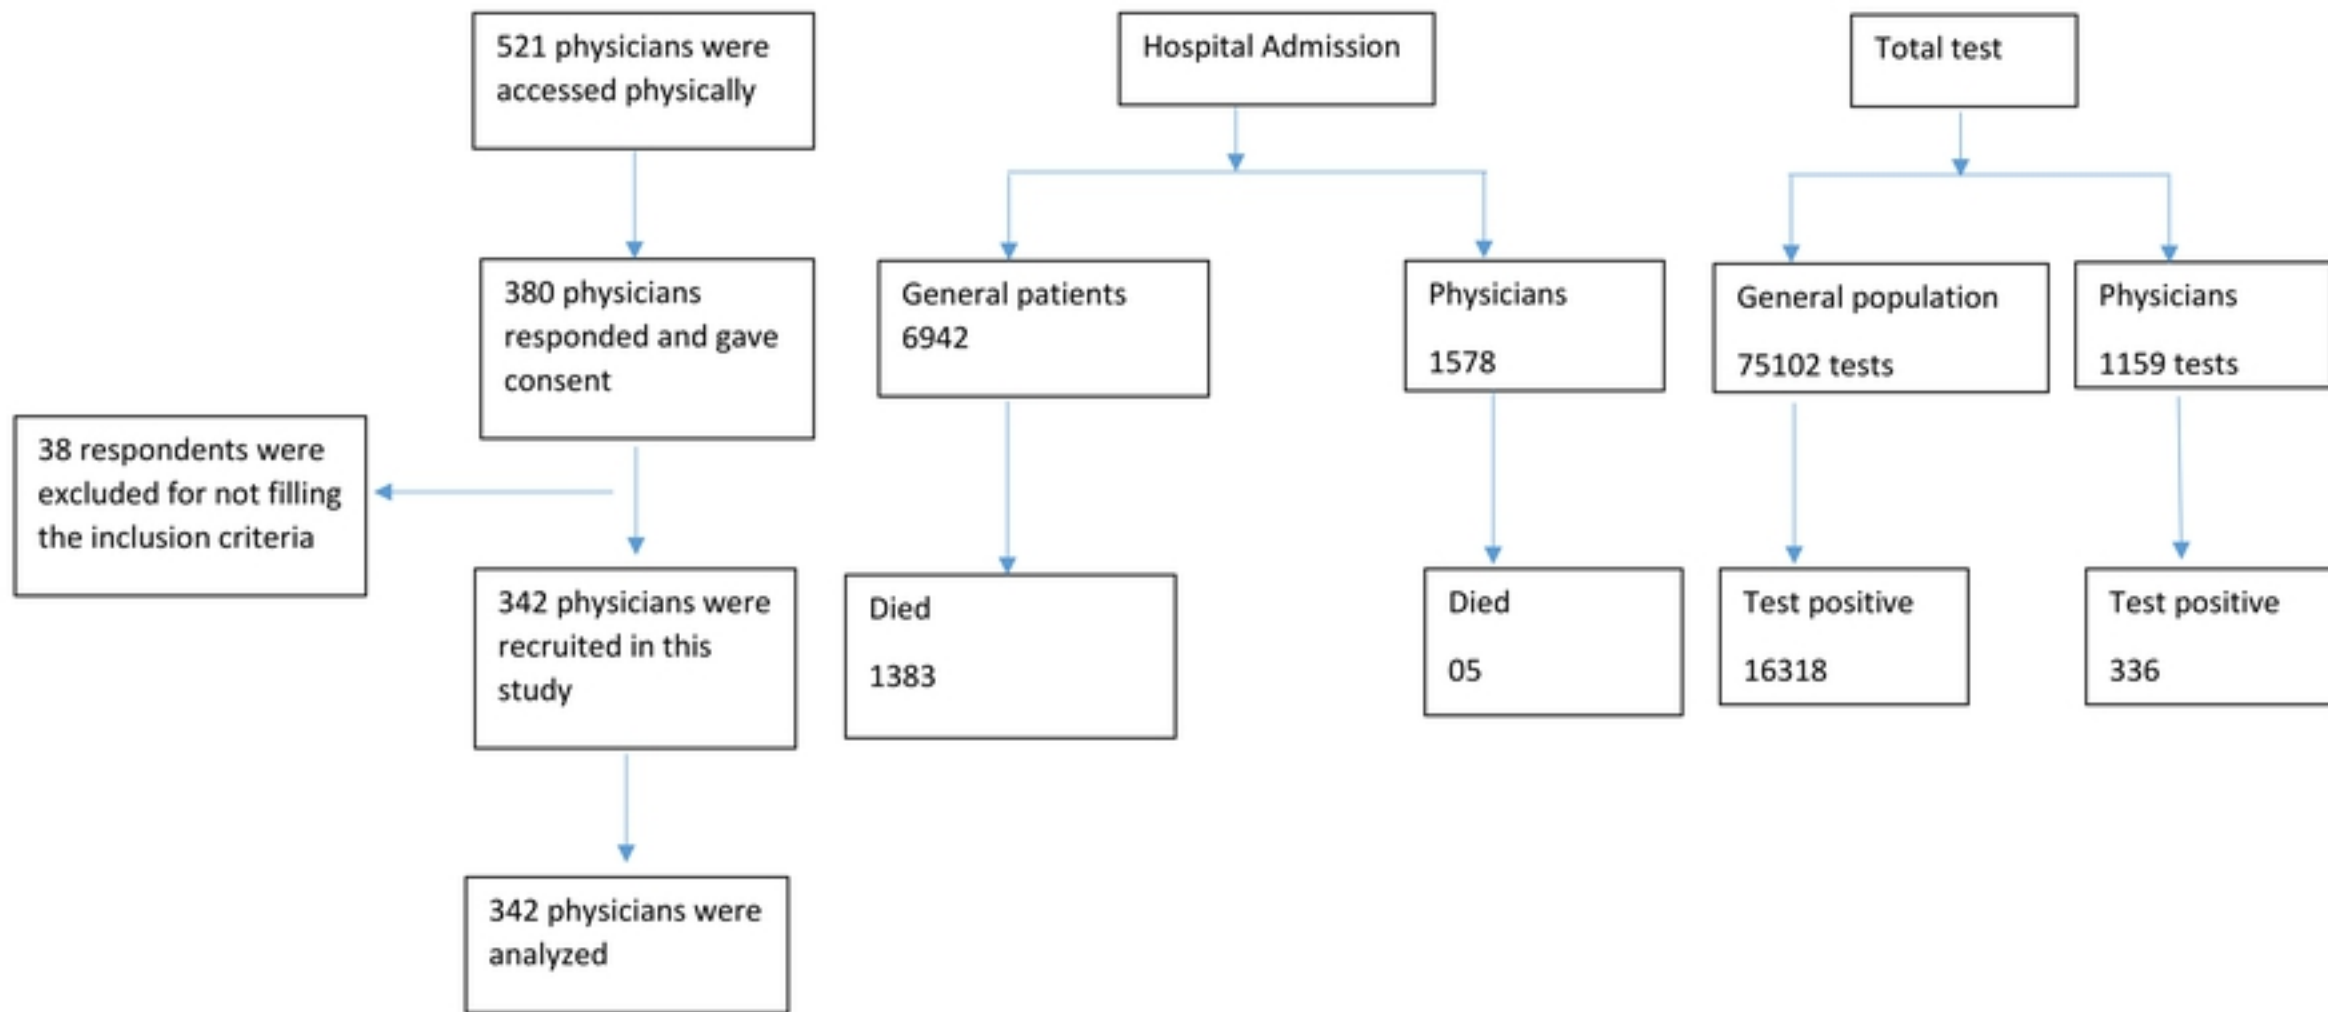

Figure 1: Patient selection for this study

Figure 1

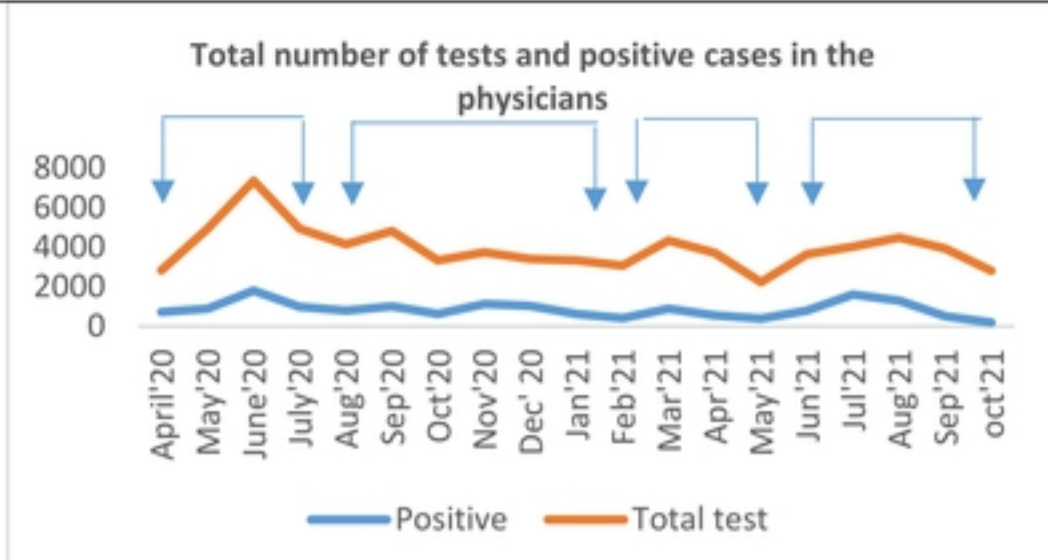

Fig-3a

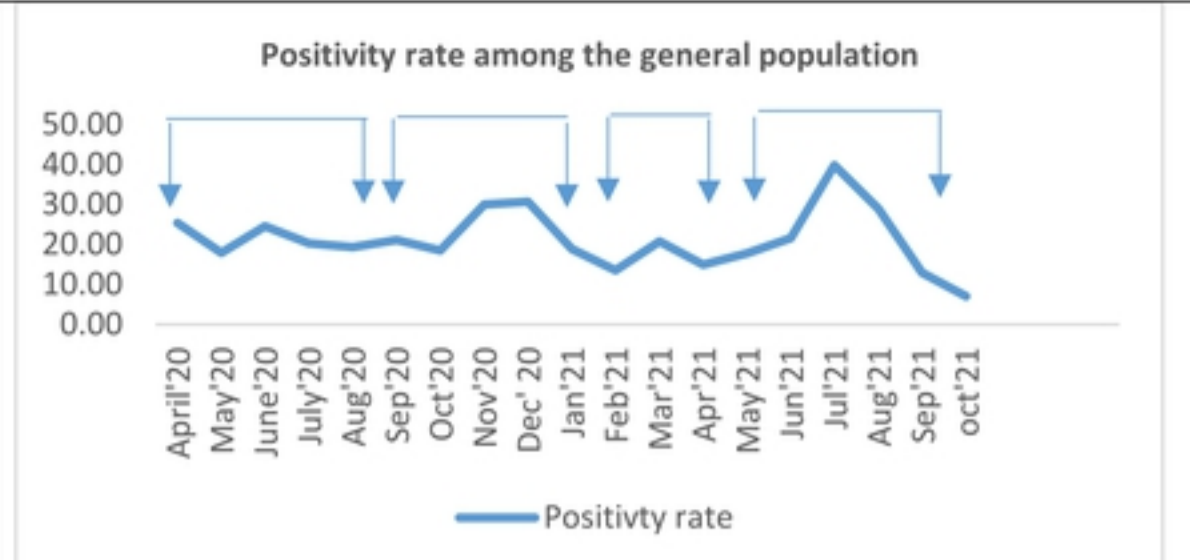

Fig 3b

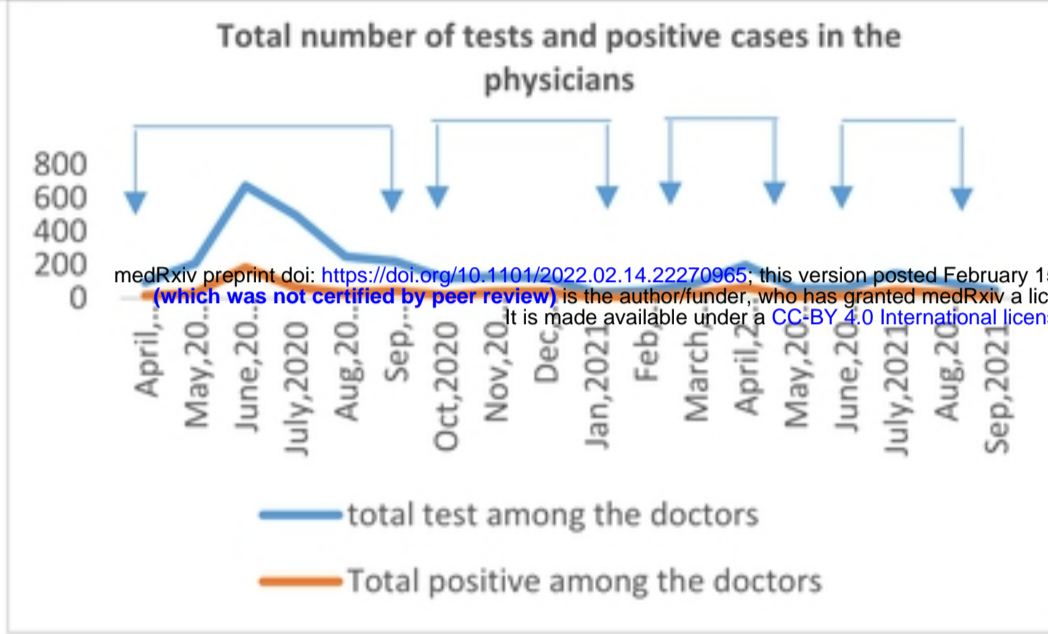

Fig: 3c

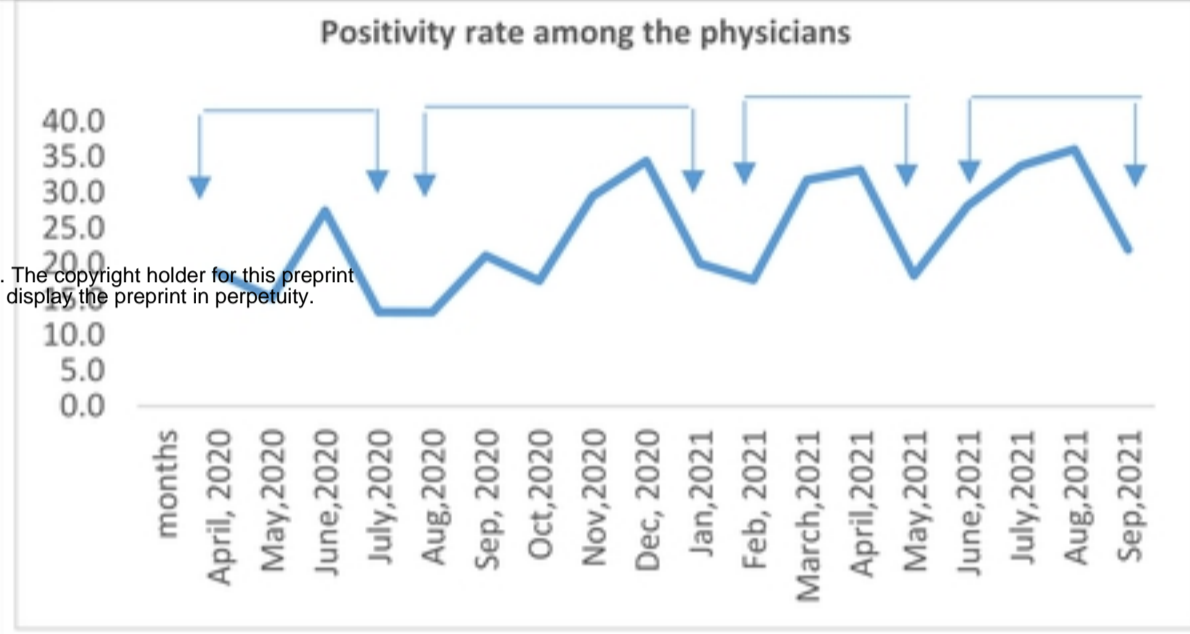

Fig 3d:

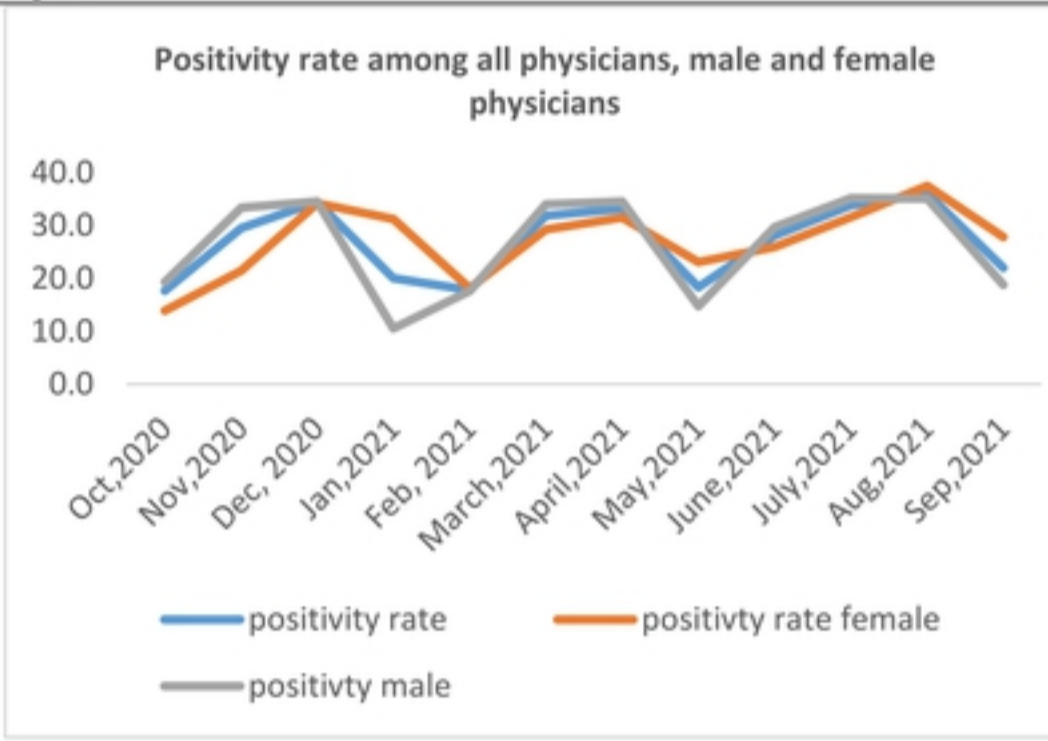

Fig: 3e

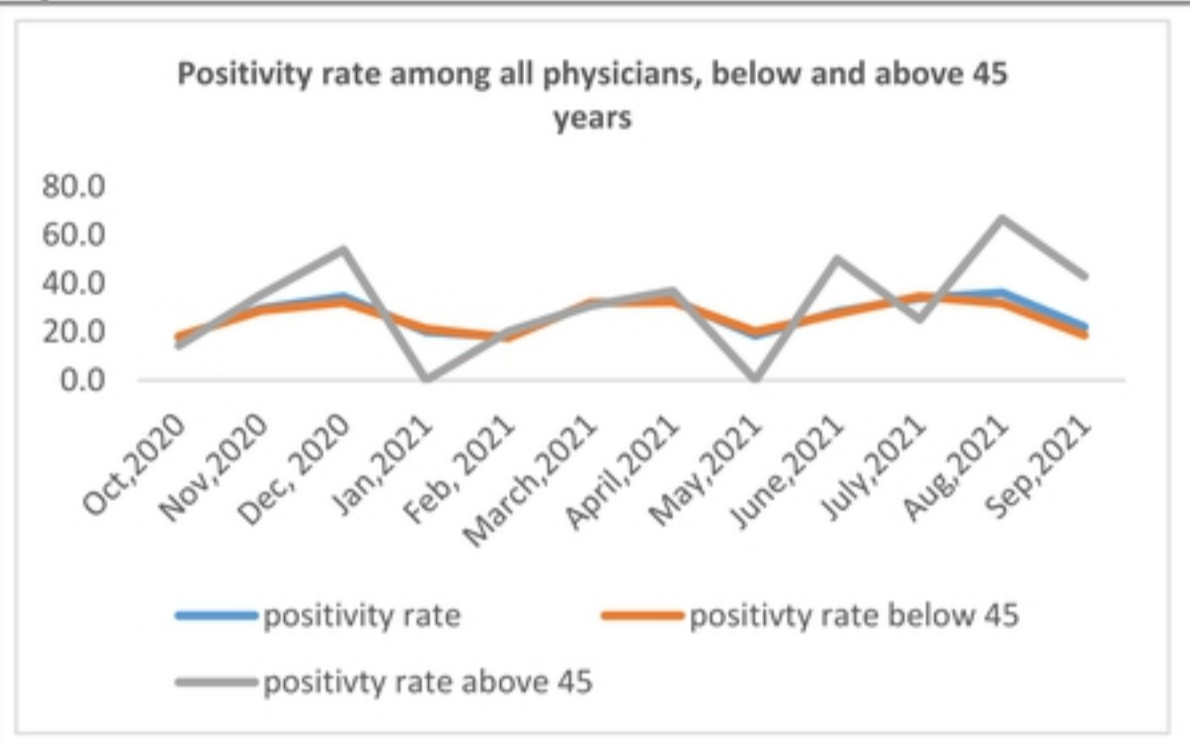

Fig 3f

Figure 3: Surges in the number of total tests, positive cases, and positivity rate (Tested in the virology laboratory of Dhaka Medical College)

3a: There were four surges of the total number of tests and positive cases among the general population. The First, second, third, and fourth surges extend from April 2020 to August 2020, September 2020 to December 2020, January 2021 to end-April 2021, and May 2021 to October 2021, respectively. 3 b: positivity rate also followed similar surges, but the peak was much higher in the fourth surge. 3c. The number of tests and positive cases among the physicians was much lower from the second to the fourth surge. 3d: Positivity rate among the physicians was higher than in the general population in all four waves. 3e: The male and the female physicians showed similar trends. (In this figure, the trends were shown from October 2020). 3f: the physicians older than 45 years higher positivity rate in the last May 2021 to September 2021 surges (fourth surge) (In this figure, the trends were shown from October 2020).

# Figure 3



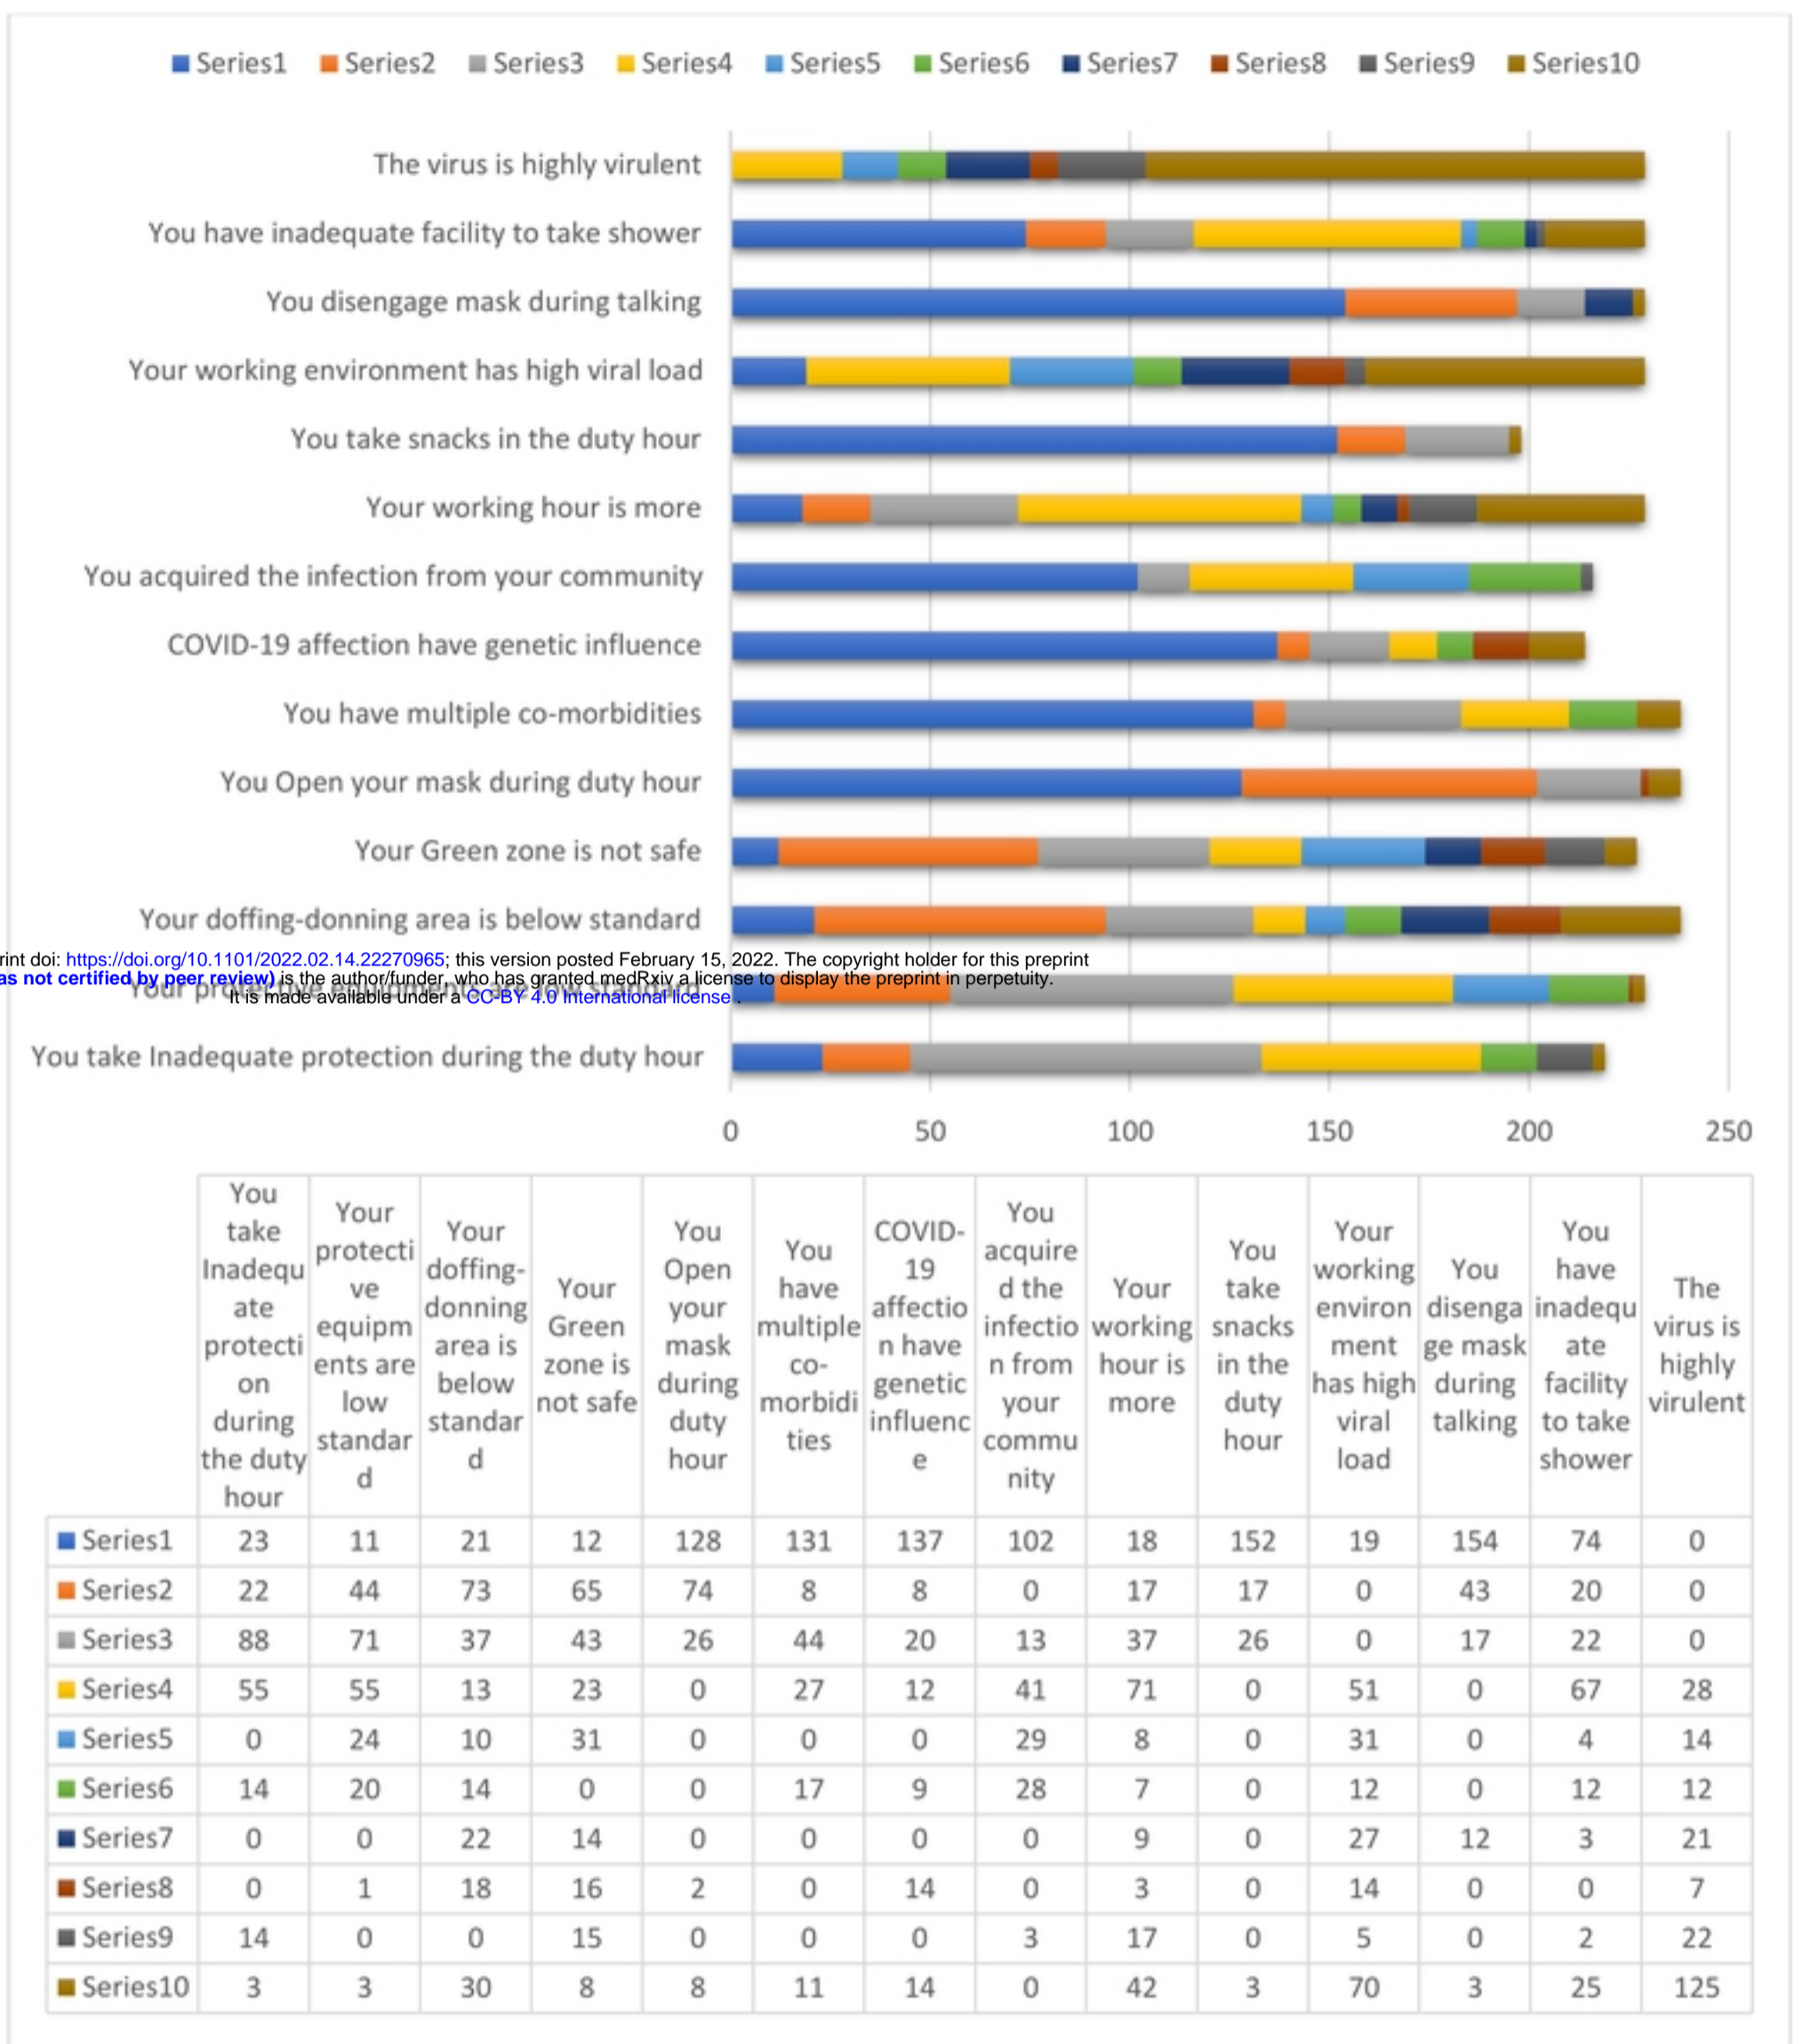

Figure 4: Physician's Opinion about the reason for having SARS-CoV-2 infection

Most of the respondents (175[76%]) consider viral virulence as a vital factor, and 116(50%) strongly agreed about high environmental viral load. They disagreed about the influence of multiple co-morbidities 183(76.9%) and genetic influence 165(77.1%). They also disagreed about their behavior like- inadequate protection during the duty hour 133(60.7%), opening mask during duty hour 228(99.6%), taking snacks in the duty hour 195(98.5%), disengaging mask during talking 214(93.4), and inadequate facility to take a shower 116(50.6%). Regarding acquiring the infection from their community, the responses were mixed (115[53.2%] disagreed).
